# Supplementary material
Source: PubMed Central journal article supplement (PMC6439629)

## Supplementary Online Content

Valle JA, Tamez H, Abbott JD, et al. Contemporary use and trends in unprotected left main coronary artery percutaneous coronary intervention in the United States: an analysis of the National Cardiovascular Data Registry Research to Practice initiative. *JAMA Cardiol*. Published online January 2, 2019. doi:10.1001/jamacardio.2018.4376

**eTable 1.** Demographic and clinical characteristics of patients undergoing ULM PCI over time

**eTable 2.** Procedural characteristics of ULM PCI over time

**eTable 3.** Clinical outcomes of patients undergoing ULM PCI over time

**eTable 4.** Clinical outcomes of patients undergoing ULM PCI stratified by tertile of operator and institutional annual PCI volumes and by tertile of institutional use of mechanical circulatory support

**eTable 5.** Baseline characteristics and outcomes in patients who underwent left main PCI in the NCDR, EXCEL trial, and NOBLE trial

**eFigure 1.** Cohort creation

**eFigure 2.** Factors associated with increased rates of major adverse cardiac events after multivariate adjustment

This supplementary material has been provided by the authors to give readers additional information about their work.

**eTable 1.** Demographic and clinical characteristics of patients undergoing ULM PCI over time

|                                 | <b>2009Q3-<br/>2011Q2</b> | <b>2011Q3-<br/>2013Q2</b> | <b>2013Q3-<br/>2015Q2</b> | <b>2015Q3-<br/>2016Q2</b> | <b>P</b> |
|---------------------------------|---------------------------|---------------------------|---------------------------|---------------------------|----------|
|                                 | N = 6686                  | N = 8954                  | N = 10659                 | N = 6829                  |          |
| <b>Demographics</b>             |                           |                           |                           |                           |          |
| Age                             | 71.6 ± 12.4               | 71.2 ± 12.6               | 72.1 ± 12.3               | 72.6 ± 12.1               | <0.001   |
| Male gender                     | 3996 (59.8)               | 5402 (60.3)               | 6425 (60.3)               | 4052 (59.3)               | 0.54     |
| Race                            |                           |                           |                           |                           |          |
| White                           | 5904 (88.3)               | 7705 (86.1)               | 9140 (85.7)               | 5846 (85.6)               | <0.001   |
| African Am.                     | 423 (6.3)                 | 646 (7.2)                 | 850 (8.0)                 | 494 (7.2)                 | 0.06     |
| Asian                           | 222 (3.3)                 | 384 (4.0)                 | 415 (3.9)                 | 283 (4.1)                 | 0.26     |
| Other                           | 67 (1.0)                  | 118 (1.3)                 | 122 (1.1)                 | 94 (1.3)                  | 0.28     |
| Hispanic ethnicity              | 347 (5.2)                 | 498 (5.6)                 | 596 (5.6)                 | 418 (6.1)                 | 0.13     |
| Insurance payor                 |                           |                           |                           |                           |          |
| None                            | 180 (2.7)                 | 324 (3.6)                 | 284 (2.7)                 | 151 (2.2)                 | <0.001   |
| Private                         | 4136 (61.9)               | 5658 (63.2)               | 6800 (63.8)               | 4351 (63.7)               | 0.056    |
| Medicare                        | 4639 (69.4)               | 6067 (67.8)               | 7512 (70.5)               | 4895 (71.7)               | <0.001   |
| Medicaid                        | 733 (11.0)                | 1016 (11.3)               | 1307 (12.3)               | 874 (12.8)                | 0.02     |
| Military                        | 218 (3.3)                 | 279 (3.0)                 | 371 (3.5)                 | 241 (3.5)                 | 0.22     |
| Other                           | 115 (1.7)                 | 121 (1.3)                 | 152 (1.4)                 | 113 (1.7)                 | 0.29     |
| <b>History</b>                  |                           |                           |                           |                           |          |
| Current tobacco                 | 1313 (19.7)               | 1768 (19.8)               | 2063 (19.4)               | 1304 (19.1)               | 0.71     |
| Hypertension                    | 5679 (84.9)               | 7666 (85.6)               | 9189 (86.2)               | 4963 (87.3)               | <0.001   |
| Dyslipidemia                    | 5246 (81.4)               | 7267 (81.3)               | 8625 (81.1)               | 5529 (81.0)               | 0.94     |
| Family History CAD <sup>b</sup> | 1164 (17.4)               | 1599 (17.9)               | 1643 (15.4)               | 912 (13.4)                | <0.001   |
| Prior MI <sup>c</sup>           | 2197 (32.9)               | 3006 (33.6)               | 3698 (34.7)               | 2361 (34.6)               | 0.05     |
| Prior Heart Failure             | 1629 (24.4)               | 2307 (25.8)               | 3136 (29.4)               | 2104 (30.8)               | <0.001   |
| Prior PCI                       | 2537 (37.9)               | 3292 (36.8)               | 3980 (37.3)               | 2593 (38.0)               | 0.34     |
| ESRD <sup>d</sup> on Dialysis   | 332 (5.0)                 | 484 (5.4)                 | 601 (5.6)                 | 432 (6.3)                 | 0.01     |
| GFR <sup>e</sup> (mean ± SD)    | 64.7 ± 20.2               | 66.0 ± 20.6               | 65.9 ± 20.8               | 65.5 ± 20.9               | <0.001   |
| Cerebrovascular Disease         | 1425 (21.3)               | 1869 (20.9)               | 2330 (21.9)               | 1529 (22.4)               | 0.11     |
| Peripheral Arterial Disease     | 1493 (22.3)               | 1910 (21.3)               | 2337 (21.9)               | 1484 (21.7)               | 0.50     |

|                                   |             |             |             |             |        |
|-----------------------------------|-------------|-------------|-------------|-------------|--------|
| Chronic Lung Disease              | 1597 (23.9) | 2210 (24.7) | 2643 (24.8) | 1656 (24.2) | 0.52   |
| Diabetes Mellitus                 | 2568 (38.4) | 3567 (39.8) | 4369 (41.0) | 2864 (41.9) | <0.001 |
| <b>Presentation</b>               |             |             |             |             |        |
| PCI Status                        |             |             |             |             |        |
| Elective                          | 2779 (41.6) | 3262 (36.4) | 3392 (31.8) | 2062 (30.2) | <0.001 |
| Urgent                            | 3203 (47.9) | 4739 (52.9) | 6090 (57.2) | 4059 (59.5) |        |
| Emergent                          | 652 (9.8)   | 893 (10.0)  | 1073 (10.1) | 647 (9.5)   |        |
| Salvage                           | 49 (0.7)    | 59 (0.7)    | 97 (0.9)    | 58 (0.8)    |        |
| CAD presentation                  |             |             |             |             |        |
| No symptoms                       | 966 (14.5)  | 893 (10.0)  | 877 (8.2)   | 538 (7.9)   | <0.001 |
| Unlikely ischemic                 | 179 (7.2)   | 204 (2.3)   | 279 (2.6)   | 198 (2.9)   |        |
| Stable angina                     | 1076 (16.1) | 1263 (14.1) | 1292 (12.1) | 788 (11.5)  |        |
| Unstable Angina                   | 2607 (39.0) | 3797 (42.4) | 4562 (42.8) | 2915 (42.7) |        |
| Non-STEMI                         | 1427 (21.4) | 2163 (24.2) | 2867 (26.9) | 1907 (27.9) |        |
| STEMI                             | 428 (6.4)   | 631 (7.0)   | 781 (7.3)   | 481 (7.0)   |        |
| CCS <sup>f</sup> Class (2 weeks)  |             |             |             |             |        |
| 0                                 | 1205 (18.1) | 1177 (13.2) | 1278 (12.0) | 849 (12.4)  | <0.001 |
| 1                                 | 352 (5.3)   | 264 (3.0)   | 201 (1.9)   | 95 (1.4)    |        |
| 2                                 | 1143 (17.1) | 1086 (12.1) | 957 (9.0)   | 548 (8.0)   |        |
| 3                                 | 2147 (32.2) | 3165 (35.4) | 3786 (25.6) | 2459 (36.1) |        |
| 4                                 | 1818 (27.3) | 3247 (36.3) | 4423 (41.6) | 2869 (42.1) |        |
| Anti-anginal medications          | 5011 (75.0) | 7207 (80.5) | 8781 (82.4) | 5668 (83.1) | <0.001 |
| Heart Failure                     | 1632 (24.4) | 2408 (26.9) | 3420 (32.1) | 2356 (34.5) | <0.001 |
| Cardiomyopathy                    | 1342 (20.1) | 2010 (22.5) | 2643 (24.8) | 1860 (27.2) | <0.001 |
| <b>Risk Model</b>                 |             |             |             |             |        |
| Cath PCI Mortality (%; mean ± SD) | 2.2 ± 7.5   | 2.2 ± 7.2   | 2.4 ± 7.9   | 2.5 ± 8.2   | 0.02   |

All values reported as n (%) unless otherwise specified.

a ULM PCI = unprotected left main coronary artery percutaneous coronary intervention

b CAD = coronary artery disease

c MI = myocardial infarction

d ESRD = end-stage renal disease

**eTable 2.** Procedural characteristics of ULM PCI over time

|                                       | <b>2009Q3-<br/>2011Q2</b> | <b>2011Q3-<br/>2013Q2</b> | <b>2013Q3-<br/>2015Q2</b> | <b>2015Q3-<br/>2016Q2</b> | <b>P</b> |
|---------------------------------------|---------------------------|---------------------------|---------------------------|---------------------------|----------|
|                                       | N = 6696                  | N = 8954                  | N = 10659                 | N = 6829                  |          |
| Arterial Access Site                  |                           |                           |                           |                           |          |
| Femoral                               | 6319 (94.5)               | 7998 (89.3)               | 8815 (82.7)               | 5403 (79.1)               | <0.001   |
| Brachial                              | 45 (0.7)                  | 52 (0.6)                  | 59 (0.6)                  | 24 (0.4)                  |          |
| Radial                                | 315 (4.7)                 | 890 (9.9)                 | 1735 (16.3)               | 1383 (20.3)               |          |
| MCS <sup>a</sup>                      | 1511 (22.6)               | 2071 (23.1)               | 2592 (24.3)               | 1995 (29.2)               | <0.001   |
| IABP                                  | 1055 (15.8)               | 1275 (14.2)               | 1402 (13.2)               | 806 (11.8)                | <0.001   |
| Other MCS                             | 529 (7.9)                 | 898 (10.0)                | 1315 (12.3)               | 1281 (18.8)               | <0.001   |
| Contrast Volume (mL; mean ± SD)       | 231.2 ± 122               | 219.6 ± 114.5             | 212.0 ± 111.8             | 207.0 ± 107.6             | <0.001   |
| Fluoroscopy Time (minutes; mean ± SD) | 22.0 ± 15.4               | 22.3 ± 16.2               | 23.3 ± 16.6               | 24.3 ± 17.1               | <0.001   |
| <b>Lesion</b>                         |                           |                           |                           |                           |          |
| Class C                               | 4901 (73.3)               | 6555 (73.2)               | 7721 (73.6)               | 3691 (75.6)               | 0.012    |
| LMCA bifurcation                      |                           |                           |                           |                           |          |
| 1 Stent                               |                           |                           |                           |                           |          |
| >1 Stent                              |                           |                           |                           |                           |          |
| Lesion treated previously             |                           |                           |                           |                           |          |
| Restenosis                            | 523 (7.8)                 | 687 (7.7)                 | 761 (7.3)                 | 347 (7.1)                 | 0.34     |
| Stent thrombosis                      | 47 (0.7)                  | 54 (0.6)                  | 85 (0.8)                  | 32 (0.7)                  | 0.37     |
| Lesion length (mm; mean ± SD)         | 46.2 ± 48.5               | 48.2 ± 49.9               | 53.9 ± 56.5               | 57.2 ± 59.8               | <0.001   |
| Number of lesions treated (mean ± SD) | 2.1 ± 1.2                 | 1.9 ± 1.1                 | 1.9 ± 1.1                 | 2.0 ± 1.1                 | <0.001   |
| Multivessel PCI                       | 3135 (46.9)               | 3930 (43.9)               | 4877 (45.8)               | 3693 (54.1)               |          |
| <b>PCI</b>                            |                           |                           |                           |                           |          |
| Intravascular ultrasound              | 1035 (38.6)               | 1412 (42.5)               | 1448 (38.7)               | 662 (38.5)                | 0.002    |
| Atherectomy                           |                           |                           |                           |                           |          |
| Laser                                 | 15 (0.2)                  | 36 (0.4)                  | 41 (0.4)                  | 34 (0.7)                  | <0.001   |
| Orbital                               | 0 (0.0)                   | 0 (0.0)                   | 76 (0.7)                  | 144 (3.0)                 |          |
| Rotational                            | 450 (6.7)                 | 613 (6.8)                 | 914 (8.7)                 | 463 (9.5)                 |          |

|                              |             |             |             |             |        |
|------------------------------|-------------|-------------|-------------|-------------|--------|
| Thrombectomy                 |             |             |             |             |        |
| Aspiration                   | 124 (1.9)   | 147 (1.6)   | 174 (1.7)   | 59 (1.2)    | 0.054  |
| Mechanical                   | 27 (0.4)    | 34 (0.4)    | 36 (0.3)    | 15 (0.3)    | 0.822  |
| Cutting or scoring balloon   | 684 (10.2)  | 998 (11.1)  | 1132 (10.8) | 442 (9.1)   | <0.001 |
| Number of Stents (mean ± SD) | 2.3 ± 1.4   | 2.1 ± 1.3   | 2.2 ± 1.3   | 2.2 ± 1.3   | <0.001 |
| Bare Metal Stents            | 1382 (20.7) | 1602 (17.9) | 1293 (12.1) | 554 (8.1)   | <0.001 |
| Drug Eluting Stents          | 5594 (83.7) | 7640 (85.3) | 9603 (90.1) | 6389 (93.6) | <0.001 |
| DES <sup>b</sup> type        |             |             |             |             |        |
| Co Cr EES <sup>c</sup>       | 3506 (62.7) | 3881 (50.8) | 3241 (33.7) | 1390 (21.8) | <0.001 |
| PI Cr EES <sup>d</sup>       | 0 (0.0)     | 1311 (17.2) | 3107 (32.4) | 1860 (29.1) |        |
| ZES <sup>e</sup>             | 412 (7.4)   | 1424 (18.6) | 2382 (28.4) | 988 (15.5)  |        |
| PES <sup>f</sup>             | 680 (12.2)  | 464 (6.1)   | 55 (0.6)    | 8 (0.1)     |        |
| SES <sup>g</sup>             | 416 (7.4)   | 11 (0.1)    | 0 (0.0)     | 0 (0.0)     |        |
| Other DES                    | 6 (0.1)     | 0 (0.0)     | 157 (1.6)   | 1846 (28.9) |        |
| >1 DES type                  | 574 (10.3)  | 549 (7.2)   | 661 (6.9)   | 297 (4.6)   |        |

All values reported as n (%) unless otherwise specified.

a MCS = mechanical circulatory support

b DES = drug eluting stent

c Co Cr EES = cobalt chromium everolimus eluting stent

d PI Cr EES = platinum chromium everolimus eluting stent

e ZES = zotarolimus eluting stent

f PES = paclitaxel eluting stent

g SES = sirolimus eluting stent

**eTable 3.** Clinical outcomes of patients undergoing ULM PCI over time

|                                                     | <b>2009Q3-<br/>2011Q2</b> | <b>2011Q3-<br/>2013Q2</b> | <b>2013Q3-<br/>2015Q2</b> | <b>2015Q3-<br/>2016Q2</b> | <b>P</b> |
|-----------------------------------------------------|---------------------------|---------------------------|---------------------------|---------------------------|----------|
|                                                     | N = 6696                  | N = 8954                  | N = 10659                 | N = 6829                  |          |
| Death, MI <sup>a</sup> , Stroke<br>or Emergent CABG | 620 (9.3)                 | 835 (9.3)                 | 950 (8.9)                 | 543 (8.0)                 | 0.013    |
| Death                                               | 295 (4.4)                 | 434 (4.8)                 | 555 (5.2)                 | 359 (5.3)                 | 0.067    |
| MI                                                  | 303 (4.5)                 | 411 (4.6)                 | 402 (3.8)                 | 169 (2.5)                 | <0.001   |
| Stroke                                              | 35 (0.5)                  | 35 (0.4)                  | 58 (0.5)                  | 48 (0.7)                  | 0.066    |
| Emergent CABG <sup>b</sup>                          | 43 (0.6)                  | 45 (0.5)                  | 46 (0.4)                  | 25 (0.4)                  | 0.102    |

All values reported as n (%) unless otherwise specified.

a MI = myocardial Infarction

b CABG = coronary artery bypass grafting

**eTable 4.** Clinical outcomes of patients undergoing ULM PCI stratified by tertile of operator and institutional annual PCI volumes and by tertile of institutional use of mechanical circulatory support

|                                                                     | <b>Tertile 1</b> | <b>Tertile 2</b> | <b>Tertile 3</b> | <b>P</b> |
|---------------------------------------------------------------------|------------------|------------------|------------------|----------|
| <b>Institutional Annual PCI<sup>a</sup> Volume</b>                  | <b>4 – 162</b>   | <b>163-359</b>   | <b>&gt;360</b>   |          |
| ULM PCI <sup>b</sup> Total per tertile                              | 1236             | 6379             | 25513            |          |
| Death, MI <sup>c</sup> , Stroke or Emergent CABG <sup>d</sup>       | 137 (11.1)       | 623 (9.5)        | 2188 (8.6)       | <0.001   |
| Death                                                               | 80 (6.5)         | 397 (6.2)        | 1166 (4.6)       | <0.001   |
| MI                                                                  | 63 (5.1)         | 230 (3.6)        | 992 (3.9)        | 0.045    |
| Stroke                                                              | 5 (0.4)          | 32 (0.5)         | 139 (0.5)        | 0.752    |
| Emergent CABG                                                       | 9 (0.7)          | 39 (0.9)         | 111 (0.4)        | 0.083    |
| <b>Operator Annual PCI Volume</b>                                   | <b>4-27</b>      | <b>28-64</b>     | <b>&gt;65</b>    |          |
| ULM PCI Total per tertile                                           | 738              | 6017             | 26373            |          |
| Death, MI, Stroke or Emergent CABG                                  | 104 (14.1)       | 610 (10.1)       | 2234 (8.5)       | <0.001   |
| Death                                                               | 64 (8.7)         | 373 (6.2)        | 1206 (4.6)       | <0.001   |
| MI                                                                  | 46 (6.2)         | 245 (4.1)        | 994 (3.8)        | 0.002    |
| Stroke                                                              | 1 (0.1)          | 35 (0.6)         | 140 (0.5)        | 0.289    |
| Emergent CABG                                                       | 10 (1.4)         | 46 (0.8)         | 103 (0.4)        | <0.001   |
| <b>Institutional Use of IABP</b>                                    |                  |                  |                  |          |
| Death, MI <sup>c</sup> , Stroke or Emergent CABG <sup>d</sup>       | 562 (7.8)        | 1136 (8.6)       | 1250 (9.9)       | <0.001   |
| Death                                                               | 333 (4.6)        | 610 (4.6)        | 700 (5.5)        | 0.001    |
| MI                                                                  | 217 (3.0)        | 517 (3.9)        | 551 (4.3)        | <0.001   |
| Stroke                                                              | 39 (0.5)         | 69 (0.5)         | 68 (0.5)         | 0.982    |
| Emergent CABG                                                       | 34 (0.5)         | 60 (0.5)         | 65 (0.5)         | 0.784    |
| <b>Institutional Use of non-IABP Mechanical Circulatory Support</b> |                  |                  |                  |          |
| Death, MI, Stroke or Emergent CABG                                  | 277 (10.2)       | 988 (8.0)        | 1683 (9.3)       | <0.001   |
| Death                                                               | 157 (5.8)        | 569 (4.6)        | 917 (5.1)        | 0.025    |

|               |           |           |           |        |
|---------------|-----------|-----------|-----------|--------|
| MI            | 100 (3.7) | 405 (3.3) | 780 (4.3) | <0.001 |
| Stroke        | 18 (0.7)  | 56 (0.5)  | 102 (0.6) | 0.270  |
| Emergent CABG | 31 (1.1)  | 60 (0.5)  | 68 (0.4)  | <0.001 |

All values reported as n (%) unless otherwise specified.

a PCI = percutaneous coronary intervention

b ULM PCI = unprotected left main percutaneous coronary intervention

c MI = myocardial Infarction

d CABG = coronary artery bypass grafting



**eTable 5.** Baseline characteristics and outcomes in patients who underwent left main PCI in the NCDR, EXCEL trial, and NOBLE trial

|                                                    | NCDR <sup>a</sup> | EXCEL        | NOBLE             | p-value |
|----------------------------------------------------|-------------------|--------------|-------------------|---------|
| <b>Baseline Demographics</b>                       |                   |              |                   |         |
|                                                    | n = 33,128        | n = 948      | n = 592           |         |
| Age (mean ± SD)                                    | 71.8 ± 12.4       | 66 ± 9.6     | 66.2 ± 9.9        | <.001   |
| Female gender                                      | 13,253 (40.0)     | 226 (23.8)   | 116 (19.6)        | <.001   |
| White                                              | 28,595 (86.3)     | 844 (91.5)   | -                 | <.001   |
| BMI <sup>b</sup> (kg/m <sup>2</sup> ; mean ± SD)   | 28.7 ± 8.1        | 28.6 ± 5     | 27.9 ± 4.5        | 0.051   |
| Diabetes Mellitus                                  | 13,368 (40.4)     | 286 (30.2)   | 86 (14.5)         | <.001   |
| Hypertension                                       | 28,497 (86.0)     | 703 (74.5)   | 386 (65.2)        | <.001   |
| Smoking, active                                    | 6,447 (19.5)      | 222 (24.1)   | 108 (18.2)        | <.001   |
| Previous PCI <sup>c</sup>                          | 118,1763 (35.4)   | 174 (18.4)   | 116 (29.5)        | <.001   |
| Previous CABG <sup>d</sup>                         | -                 | 0            | 4 (0.7)           |         |
| Congestive Heart Failure                           | 9,176 (27.7)      | 67 (7.1)     |                   | <.001   |
| Indication                                         |                   |              |                   |         |
| Acute coronary syndrome                            |                   |              | 106 (17.0)        |         |
| STEMI                                              | 2,321 (7.0)       | 13 (1.4)     | 0 (0.0)           | <.001   |
| NSTEMI                                             | 8,364 (25.3)      | 124 (13.2)   |                   | <.001   |
| UA <sup>e</sup>                                    | 13,881 (41.9)     | 228 (24.2)   |                   | <.001   |
| Stable angina                                      | 4,419 (13.3)      | 500 (53.1)   | 486 (82.1)        | <.001   |
| Silent/unlikely to be ischemic                     | 4,134 (12.4)      | 73 (7.7)     |                   | <.001   |
| <b>Procedure Characteristics</b>                   |                   |              |                   |         |
| Contrast volume (mL; mean ± SD)                    | 216.0 ± 114.1     | 256 ± 127    | 200 (IQR 150-280) | <.001   |
| Fluoroscopy time (minutes; mean ± SD)              | 23 ± 16.4         | 24 ± 16      | 25 (IQR 11-24)    | 0.002   |
| Anticoagulation                                    |                   |              |                   |         |
| Unfractionated heparin                             | 21031 (63.5)      | 787 (83.0)   | 411 (72.6)        | <.001   |
| Bivalirudin                                        | 16048 (48.4)      | 338 (35.7)   | 108 (18.9)        | <.001   |
| Arterial access site                               |                   |              |                   |         |
| Femoral                                            | 28,535 (86.2)     | 744 (72.9)   |                   | <.001   |
| Radial                                             | 4,323 (13.1)      | 275 (26.9)   |                   |         |
| Brachial                                           | 180 (0.5)         | 2 (0.2)      |                   |         |
| Number of lesions treated (mean ± SD)              | 2.0 ± 1.1         | 1.0 ± 1.1    | 2.0 ± 1.5         | <.001   |
| Number of stents implanted per patient (mean ± SD) | 2.2 ± 1.3         | 2.4 ± 1.5    |                   | <.001   |
| Drug eluting stent used                            | 29,226 (88.2)     | 2,282 (99.8) |                   | <.001   |
| Lesion involving bifurcation                       | 14,947 (45.1)     | 763 (80.5)   | 508 (87.7)        | <.001   |
| Two-stent technique (% of bifurcation lesions)     | 6053 (40.5)       |              | 187 (36.8)        | <.001   |
| Multivessel PCI                                    | 15635 (47.2)      |              | 263 (44.4)        | 0.30    |

|                                                                  |              |            |            |       |
|------------------------------------------------------------------|--------------|------------|------------|-------|
| Intravascular ultrasound guidance                                | 4557 (39.8)  | 722 (77.2) | 430 (74.9) | <.001 |
| Mechanical circulatory support                                   | 8,169 (24.7) | 53 (5.6)   |            | <.001 |
| <b>Outcomes</b>                                                  |              |            |            |       |
| Death, myocardial infarction or stroke                           |              | 137 (15.4) | 137 (23.1) | <.001 |
| Death, myocardial infarction or stroke at 30-days or in-hospital | 2,993 (9.0)  | 46 (4.9)   |            | <.001 |
| Death at 30 days or in-hospital                                  | 1,643 (5.0)  | 9 (1.0)    | 2 (0.0)    | <.001 |
| Stroke at 30 days or in-hospital                                 | 176 (0.5)    | 6 (0.6)    | 0          | 0.43  |
| Myocardial infarction at 30 days or in-hospital                  | 1,285 (3.9)  | 37 (3.9)   | 19 (3.2)   | 0.73  |

All values reported as n (%) unless otherwise specified. Proportions listed exclude those with missing data from the denominator. For comparison of mean versus median values, mean was assumed to equal median values, and SD estimated as the IQR divided by 1.35.

a NCDR = National Cardiovascular Data Registry

b BMI = body mass index

c PCI = percutaneous coronary intervention

d CABG = coronary artery bypass grafting

e UA = unstable angina

**eFigure 1.** Cohort creation

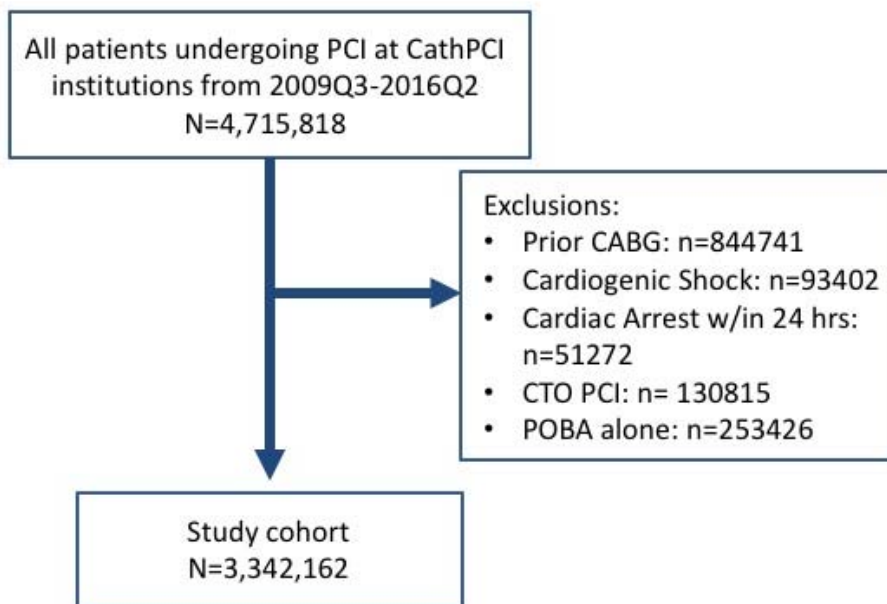

**eFigure 2.** Factors associated with increased rates of major adverse cardiac events after multivariate adjustment

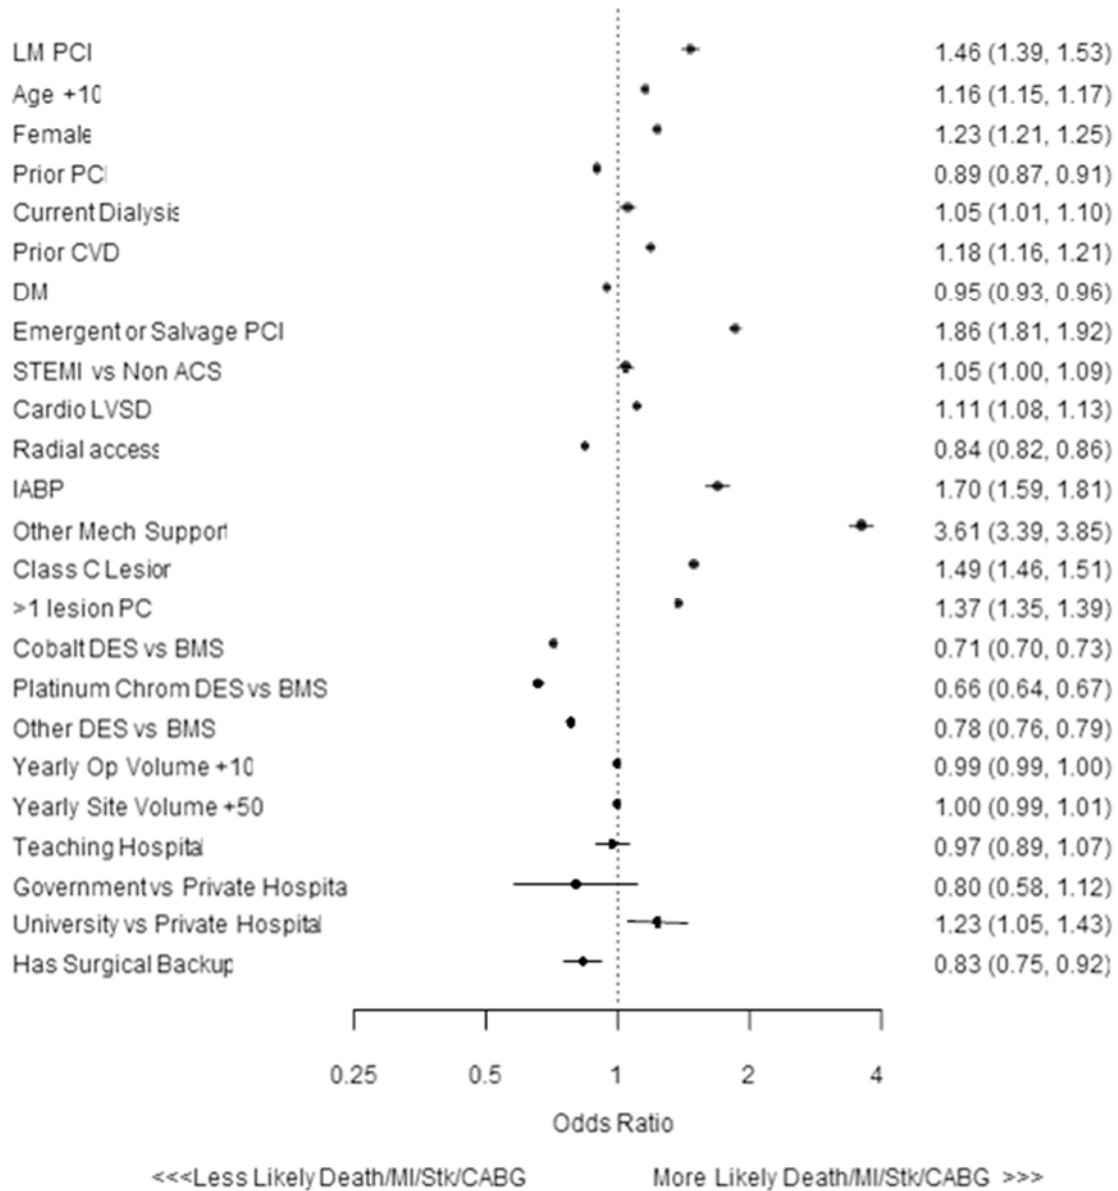

Supplement: jamacardiol-4-100-s001.pdf [file jamacardiol-4-100-s001.pdf]
